# Supplementary material
Source: publisher figshare collection journal article supplement (https://acs.figshare.com/ndownloader/files/4212214)
Supplement: Supplementary file 1 [file 4212214]

## Supporting Information

### Size-Controlled Gold Nanoparticles Synthesized in Solution Plasma

Maria Antoneta Bratescu<sup>\*,1</sup>, Sung-Pyo Cho<sup>2</sup>, Osamu Takai<sup>2</sup>, and Nagahiro Saito<sup>1</sup>

<sup>1</sup>EcoTopia Science Institute, Nagoya University, Furo-cho, Chikusa-ku, Nagoya, 464-8603, Japan

<sup>2</sup>Graduate School of Engineering, Nagoya University, Furo-cho, Chikusa-ku, Nagoya, 464-8603, Japan

\*Electronic mail: [maria@eco-t.esi.nagoya-u.ac.jp](mailto:maria@eco-t.esi.nagoya-u.ac.jp)

#### 1. Characteristics of the solutions before and after SPP

Table S1. pH and conductivity of the gold solutions before and after the Solution Plasma Processing (SPP).

| solution | pH     |       | $\sigma / \mu\text{S cm}^{-1}$ |       |
|----------|--------|-------|--------------------------------|-------|
|          | before | after | before                         | after |
| 1.       | 3.2    | 3.0   | 350                            | 820   |
| 2.       | 6.5    | 3.6   | 130                            | 470   |
| 3.       | 12.0   | 10.6  | 1130                           | 1010  |

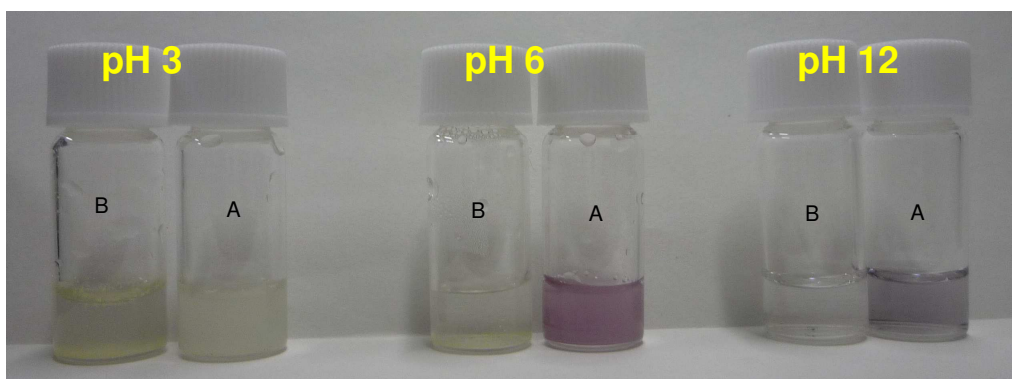

Figure S1. Photo of the gold solutions prepared at different pH values, before (B) and after (A) SPP.

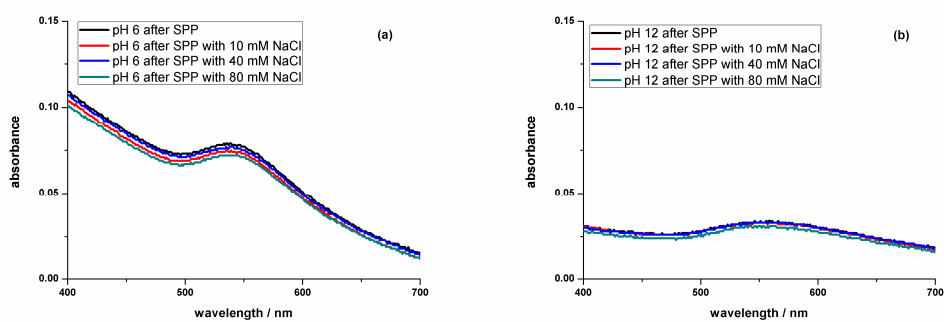

Figure S2. UV-visible spectra for gold NPs solutions with (a) pH 6 and (b) pH 12 before and after addition of NaCl solution. The final concentration of NaCl in the mixture was adjusted from 10 to 80 mM.

## 2. EDS analysis

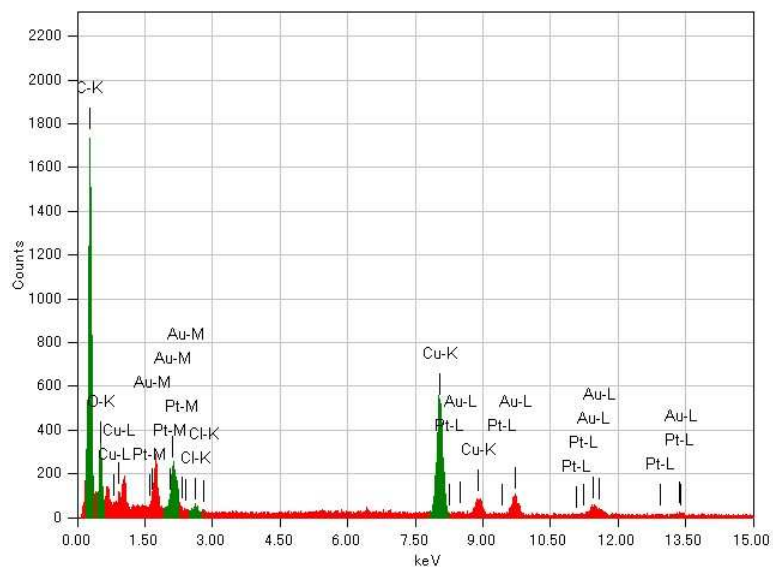

Figure S3. EDS analysis of gold NPs synthesized in pH 12 solution. The high energy spectral region from 7.50 to 15.00 eV was used to identify the elemental composition of the sample. In this region signals from Pt transitions were not detected. The low energy spectral region cannot be used to identify the atomic composition, where the peaks overlap due to the poor resolution.

## 3. ToF-SIMS maps

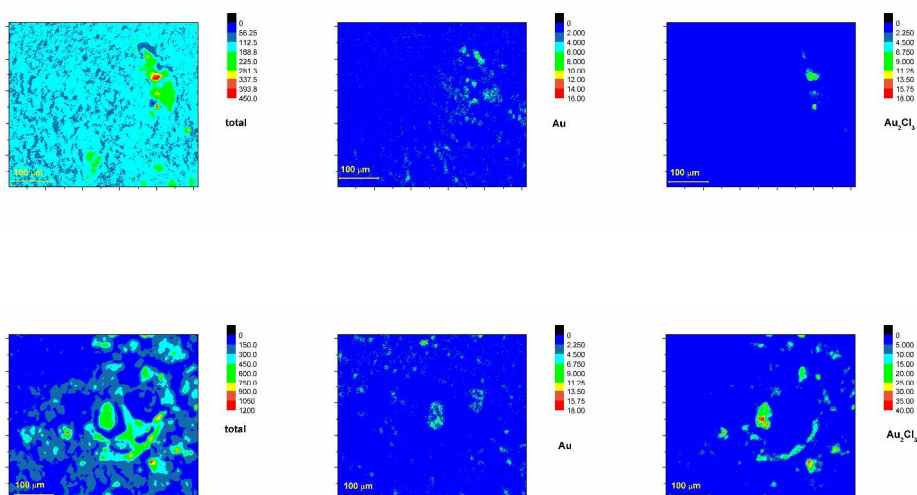

(a)

(b)

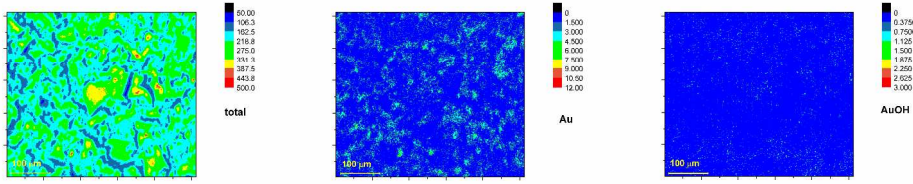

(c)

Figure S4. ToF-SIMS maps of different solutions dropped on silicon substrates, in case of (a) pH 3 solution, (b) pH 6 solution, and (c) pH 12 solution. The intensity of the signal is shown in  $\text{counts} \times 10^{-2}$ .

#### 4. Formulas for calculation of different broadening effects for $H_{\beta}$ line.<sup>1</sup>

Calculation of the van der Waals broadening (Lorentz shape):

$$\Delta\lambda_{vdW} = \frac{4.10}{T_g^{7/10}} \text{ in (nm), where } T_g \text{ is the gas temperature.}$$

Calculation of the Doppler broadening (Gauss shape):

$$\Delta\lambda_D = 3.48 \times 10^{-4} T_g^{1/2} \text{ in (nm), where } T_g \text{ is the gas temperature.}$$

#### References

- (1) Bruggeman, P.; Schram, D.; González, M.Á.; Rego, R.; Kong, M.G.; Leys, C. *Plasma Sources Sci. Technol.* **2009**, *18*, 025017-1 - 025017-13.
